# Supplementary material for: Immunoproteomic identification of anti-C9 autoimmune antibody in patients with seronegative obstetric antiphospholipid syndrome
Source: PubMed Central journal article supplement (PMC5997311; doi:10.1371/journal.pone.0198472), 2018-06-12

# S1 Fig

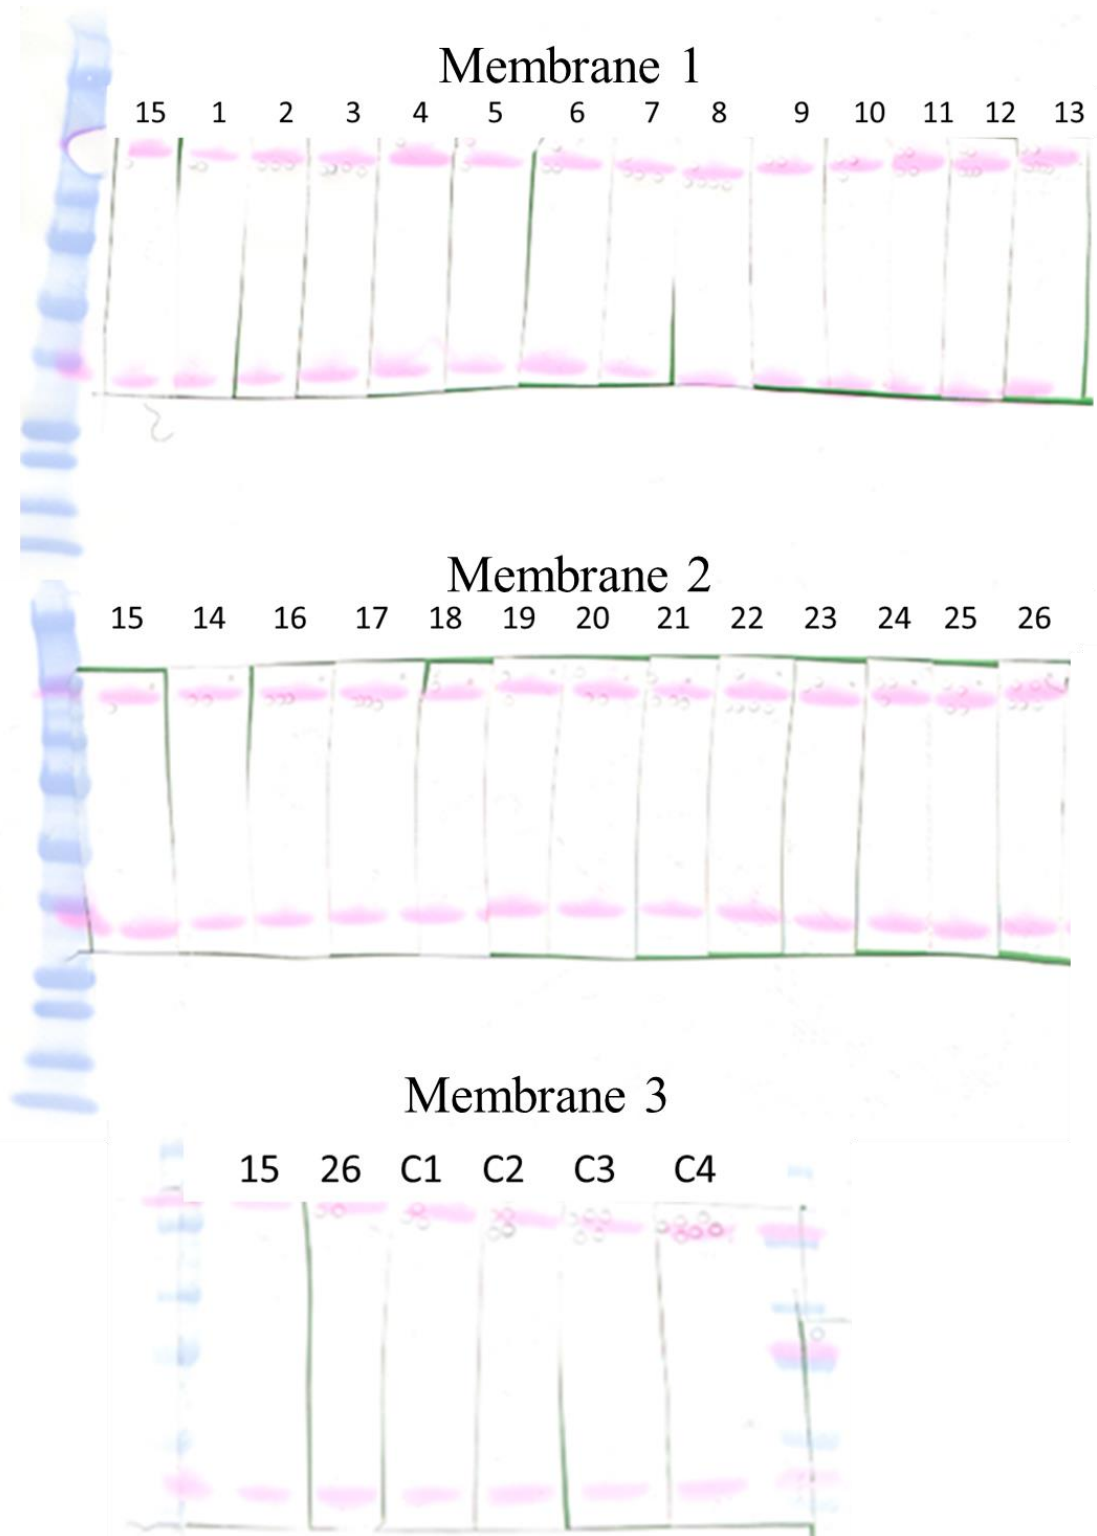

Supplement: pone.0198472.s001.pdf [file pone.0198472.s001.pdf]
